# Supplementary material for: Inhibition of Tissue Matrix Metalloproteinases Interferes with Mycobacterium tuberculosis-Induced Granuloma Formation and Reduces Bacterial Load in a Human Lung Tissue Model
Source: PubMed Central journal article supplement (PMC5723394; doi:10.3389/fmicb.2017.02370), 2017-12-05
Supplement: Presentation1.pdf [file Presentation1.pdf]

**Movie caption**

Movie showing rotating assemblies of Z-stacks obtained from confocal microscopy analysis of the lung tissue models: uninfected, Mtb-infected, Mtb-infected & mock-treated (DMSO), Mtb-infected & MMPI (marimastat)-treated. The infected models are stained with DAPI (nuclei), PKH27 (monocytes) and GFP (Mtb).
